# Supplementary material for: Public Perceptions of Environmental Public Health Risks in the United States
Source: PubMed Central journal article supplement (PMC6466406; doi:10.3390/ijerph16061045), 2019-03-22
Supplement: ijerph-16-01045-s001.pdf [file ijerph-16-01045-s001.pdf]

**Supplementary Materials:**

**Table S1. CDC Tracking Program questions and responses included in the 2013 SummerStyles survey.**

|                                                                                                                                                                                                                                                                                                                                                                                                                                                                                                                                    |
|------------------------------------------------------------------------------------------------------------------------------------------------------------------------------------------------------------------------------------------------------------------------------------------------------------------------------------------------------------------------------------------------------------------------------------------------------------------------------------------------------------------------------------|
| 1) I am aware of the government's efforts to track environmental hazards and possible links to chronic health problems.<br>Strongly disagree   Somewhat disagree   Neither disagree nor agree   Somewhat agree   Strongly disagree                                                                                                                                                                                                                                                                                                 |
| 2) How concerned are you about the risks to your health from pollutants in the environment?<br>Not at all concerned   Not very concerned   Somewhat concerned   Very concerned                                                                                                                                                                                                                                                                                                                                                     |
| 3) What are the top 3 environmental issues you are concerned may impact YOUR health?<br><ul style="list-style-type: none"> <li>• Indoor air quality</li> <li>• Lead in paint and consumer products</li> <li>• Climate change</li> <li>• Mercury in fish</li> <li>• Outdoor air quality</li> <li>• Electromagnetic field from electric and cell phone towers</li> <li>• Pesticides</li> <li>• None of these</li> <li>• Chemicals in consumer products</li> <li>• Drinking water quality</li> <li>• Waste sites/landfills</li> </ul> |
| 4) Which of these do you think may be affected by the environment in YOUR community?<br><ul style="list-style-type: none"> <li>• Asthma</li> <li>• Cancer</li> <li>• Unhealthy pregnancies</li> <li>• Carbon monoxide poisoning</li> <li>• Respiratory illness</li> <li>• Birth defects</li> <li>• Childhood lead poisoning</li> <li>• Unhealthy babies</li> <li>• Heart attacks</li> <li>• None of these</li> </ul>                                                                                                               |
| 5) Where do you look for information on how the environment affects your health?<br><ul style="list-style-type: none"> <li>• Doctor or nurse</li> <li>• Federal government</li> <li>• Media (TV, magazines, newspapers)</li> <li>• Other source</li> <li>• Policymaker</li> <li>• Health insurer</li> <li>• Community organization</li> <li>• Health department</li> <li>• Non-profit organization</li> <li>• I do not look for this information</li> </ul>                                                                        |

**Table S2. Demographic characteristics for respondents, 2013 SummerStyles<sup>1</sup>**

| Characteristic                  | <i>Unweighted</i><br><i>n</i> | <i>Weighted</i><br><i>%</i> |
|---------------------------------|-------------------------------|-----------------------------|
| Total                           | 4,033                         | 100                         |
| Age                             |                               |                             |
| 18 - 34 years old               | 1,396                         | 46.4                        |
| 35 - 64 years old               | 1,770                         | 35.3                        |
| 65+ years old                   | 867                           | 18.3                        |
| Sex                             |                               |                             |
| Male                            | 2,113                         | 51.8                        |
| Female                          | 1,920                         | 48.2                        |
| Race/ethnicity                  |                               |                             |
| Non-Hispanic white              | 3,089                         | 66.8                        |
| Non-Hispanic black              | 363                           | 11.3                        |
| Hispanic                        | 369                           | 14.8                        |
| Non-Hispanic Other <sup>2</sup> | 212                           | 7.1                         |
| Education                       |                               |                             |
| High school graduate or less    | 1,349                         | 41.5                        |

|                                |       |      |
|--------------------------------|-------|------|
| Some college                   | 1,298 | 29.0 |
| College graduate or higher     | 1,386 | 29.5 |
| Marital status                 |       |      |
| Married                        | 2,371 | 53.5 |
| Partnership                    | 276   | 37.9 |
| Other                          | 1,386 | 8.6  |
| Health status                  |       |      |
| Excellent, very good           | 1,923 | 45.8 |
| Good                           | 1,514 | 38.9 |
| Fair, poor                     | 584   | 15.3 |
| Employment status <sup>3</sup> |       |      |
| Employed                       | 2,287 | 54.5 |
| Not employed                   | 875   | 27.5 |
| Retired                        | 871   | 18.0 |
| Household income               |       |      |
| < \$34,900                     | 1,025 | 26.9 |
| \$35,000 - \$75,000            | 1,462 | 34.9 |
| > \$75,000                     | 1,546 | 38.2 |
| Household size                 |       |      |
| 1                              | 687   | 14.0 |
| 2                              | 1,512 | 34.5 |
| 3                              | 761   | 19.9 |
| 4                              | 624   | 17.3 |
| 5 more people                  | 449   | 14.3 |
| House ownership                |       |      |
| Yes                            | 3,095 | 73.0 |
| No                             | 938   | 27.0 |
| Region <sup>4</sup>            |       |      |
| Midwest                        | 1,014 | 21.4 |
| Northeast                      | 722   | 18.3 |
| South                          | 1,408 | 37.6 |
| West                           | 889   | 22.7 |

<sup>1</sup> All data were weighted and the resulting numbers were rounded to the nearest whole number.

<sup>2</sup> Other race/ethnicity = Non-Hispanic other races or two more races.

<sup>3</sup> Employment status response of employed = "part- or full-time, self-employed", not employed = "temporarily unemployed, disabled, looking for job, not employed-other," and retired.

<sup>4</sup> Northeast includes: Connecticut, Maine, Massachusetts, New Hampshire, Rhode Island, Vermont, New Jersey, New York, and Pennsylvania. Midwest includes: Illinois, Indiana, Iowa, Kansas, Michigan, Minnesota, Missouri, Nebraska, North Dakota, Ohio, South Dakota, and Wisconsin. South includes: Alabama, Arkansas, Delaware, Florida, Georgia, Kentucky, Louisiana, Maryland, Mississippi, North Carolina, Oklahoma, South Carolina, Tennessee, Texas, Virginia, Washington, D.C., and West Virginia. West includes: Arizona, California, Colorado, Idaho, Montana, Nevada, New Mexico, Oregon, Utah, Washington, and Wyoming.

**Table S3.** Univariate logistic regression: Demographic characteristics by awareness of governmental efforts on environmental health and concerns about health risks from environmental pollutants, United States, 2013.

| ConsumerStyles® characteristics | Awareness of the government's efforts to track environmental hazards and possible links to chronic health problems |                            | Concern about the risks to health from pollutants in the environment |
|---------------------------------|--------------------------------------------------------------------------------------------------------------------|----------------------------|----------------------------------------------------------------------|
|                                 | Aware vs. not aware<br>1                                                                                           | Neutral vs. not aware<br>1 | Concerned vs. not concerned<br>2                                     |
| Odds ratios (95% CI)            |                                                                                                                    |                            |                                                                      |
| Race/ethnicity                  |                                                                                                                    |                            |                                                                      |
| Non-Hispanic white              | Ref                                                                                                                | Ref                        | Ref                                                                  |
| Non-Hispanic black              | 1.14 (0.72–1.81)                                                                                                   | 2.04 (1.30–3.21)**         | 1.69 (1.21–2.36)**                                                   |
| Hispanic                        | 0.82 (0.55–1.25)                                                                                                   | 1.37 (0.92–2.03)           | 1.38 (1.02–1.88)*                                                    |
| Other <sup>3</sup>              | 0.87 (0.48–1.55)                                                                                                   | 1.21 (0.69–2.13)           | 1.89 (1.22–2.95)*                                                    |
| Age (years)                     |                                                                                                                    |                            |                                                                      |
| 18 - 34                         | Ref                                                                                                                | Ref                        | Ref                                                                  |
| 35 - 64                         | 1.27 (0.97–1.68)                                                                                                   | 1.05 (0.80–1.38)           | 1.14 (0.93–1.41)                                                     |
| 65+                             | 2.07 (1.47–2.90)***                                                                                                | 1.21 (0.85–1.71)           | 0.90 (0.70–1.14)                                                     |
| Sex                             |                                                                                                                    |                            |                                                                      |
| Male                            | 1.50 (1.16–1.92)**                                                                                                 | 1.37 (1.06–1.77)*          | Ref                                                                  |
| Female                          | Ref                                                                                                                | Ref                        | 1.49 (1.23–1.79)***                                                  |
| Education                       |                                                                                                                    |                            |                                                                      |
| High school graduate or less    | Ref                                                                                                                | Ref                        | Ref                                                                  |
| Some college                    | 1.40 (1.03–1.89)*                                                                                                  | 1.11 (0.82–1.49)           | 1.00 (0.80–1.25)                                                     |
| College graduate or higher      | 1.96 (1.45–2.65)***                                                                                                | 1.07 (0.79–1.46)           | 1.24 (0.99–1.56)                                                     |
| Marital status                  |                                                                                                                    |                            |                                                                      |
| Married                         | Ref                                                                                                                | Ref                        | Ref                                                                  |
| Partnership                     | 1.05 (0.81–1.37)                                                                                                   | 0.96 (0.74–1.27)           | 0.95 (0.78–1.16)                                                     |
| Other                           | 0.75 (0.45–1.23)                                                                                                   | 0.86 (0.52–1.40)           | 1.02 (0.70–1.48)                                                     |
| Health status                   |                                                                                                                    |                            |                                                                      |
| Excellent, very good            | 1.52 (1.19–1.95)**                                                                                                 | 1.13 (0.88–1.46)           | Ref                                                                  |
| Good, fair, poor                | Ref                                                                                                                | Ref                        | 1.26 (1.05–1.52)*                                                    |
| Employment status <sup>4</sup>  |                                                                                                                    |                            |                                                                      |
| Employed                        | Ref                                                                                                                | Ref                        | Ref                                                                  |
| Not employed                    | 0.75(0.56–1.02)                                                                                                    | 1.09 (0.81–1.48)           | 1.17 (0.93–1.48)                                                     |
| Retired                         | 1.76 (1.29–2.41)***                                                                                                | 1.38 (0.99–1.91)           | 0.84 (0.67–1.06)                                                     |
| Household income                |                                                                                                                    |                            |                                                                      |
| < \$34,900                      | Ref                                                                                                                | Ref                        | Ref                                                                  |
| \$35,000 - \$75,000             | 1.18 (0.86–1.64)                                                                                                   | 1.06 (0.77–1.46)           | 0.79 (0.62–0.99)                                                     |
| > \$75,000                      | 1.39 (1.01–1.90)*                                                                                                  | 0.91 (0.66–1.25)           | 0.97 (0.76–1.23)                                                     |
| Household size                  |                                                                                                                    |                            |                                                                      |
| 1 – 2 people                    | Ref                                                                                                                | Ref                        | Ref                                                                  |
| 3 or more people                | 0.89 (0.69–1.13)                                                                                                   | 1.11 (0.87–1.43)           | 0.99 (0.82–1.19)                                                     |
| House ownership                 |                                                                                                                    |                            |                                                                      |
| Yes                             | Ref                                                                                                                | Ref                        | Ref                                                                  |
| No                              | 0.89 (0.66–1.19)                                                                                                   | 1.31 (0.98–1.76)           | 1.15 (0.93–1.44)                                                     |
| Region <sup>5</sup>             |                                                                                                                    |                            |                                                                      |
| Midwest                         | Ref                                                                                                                | Ref                        | Ref                                                                  |
| Northeast                       | 0.95 (0.64–1.39)                                                                                                   | 1.08 (0.72–1.61)           | 1.30 (0.98–1.73)                                                     |

|       |                  |                  |                    |
|-------|------------------|------------------|--------------------|
| South | 0.86 (0.62–1.20) | 1.16 (0.83–1.62) | 1.35 (1.06–1.72)*  |
| West  | 0.84 (0.58–1.21) | 1.14 (0.78–1.66) | 1.58 (1.20–2.08)** |

<sup>1</sup> Aware = “strongly agree” and “somewhat agree” responses; not aware = “strongly disagree” and “somewhat disagree” responses; and neutral = “neither disagree nor agree” responses.

<sup>2</sup> Concerned = “very concerned” and “somewhat concerned” responses and not concerned = “not at all concerned” and “not very concerned” responses.

<sup>3</sup> Other race/ethnicity = Non-Hispanic other races or two more races.

<sup>4</sup> Employment status response of employed = “part- or full-time, self-employed”, not employed = “temporarily unemployed, disabled, looking for job, not employed-other,” and retired.

<sup>5</sup> Northeast includes: Connecticut, Maine, Massachusetts, New Hampshire, Rhode Island, Vermont, New Jersey, New York, and Pennsylvania. Midwest includes: Illinois, Indiana, Iowa, Kansas, Michigan, Minnesota, Missouri, Nebraska, North Dakota, Ohio, South Dakota, and Wisconsin. South includes: Alabama, Arkansas, Delaware, Florida, Georgia, Kentucky, Louisiana, Maryland, Mississippi, North Carolina, Oklahoma, South Carolina, Tennessee, Texas, Virginia, Washington, D.C., and West Virginia. West includes: Arizona, California, Colorado, Idaho, Montana, Nevada, New Mexico, Oregon, Utah, Washington, and Wyoming. Notes: \*  $p < 0.05$ , \*\* $p < 0.01$ , \*\*\* $p < 0.001$ .
